# Supplementary material for: Immunogenicity and Effectiveness of Primary and Booster Vaccine Combination Strategies during Periods of SARS-CoV-2 Delta and Omicron Variants
Source: MDPI journal article supplement (doi:10.3390/vaccines10101596), 2022-09-22
Supplement: s1 [file s1]

**Table S1.** Demographic characteristics of the participants used to estimate effectiveness of vaccination schemes including BNT162b2 or Gam-COVID-Vac during the Delta wave.

|                                                                           | No vaccination              |          |                           |          |                                     |          | 2 Gam-COVID-Vac doses<br>(2nd dose given 3 to < 6 months prior to start of the wave) |          |                            |          |                                      |          | 2 BNT162b2 doses<br>(2nd dose given < 3 months prior to start of the wave) |          |                           |          |                                      |          |
|---------------------------------------------------------------------------|-----------------------------|----------|---------------------------|----------|-------------------------------------|----------|--------------------------------------------------------------------------------------|----------|----------------------------|----------|--------------------------------------|----------|----------------------------------------------------------------------------|----------|---------------------------|----------|--------------------------------------|----------|
|                                                                           | All participants<br>(N=216) |          | COVID-19-naïve<br>(N=158) |          | COVID-19-experi-<br>enced<br>(N=58) |          | All participants<br>(N=2875)                                                         |          | COVID-19-naïve<br>(N=2113) |          | COVID-19-experi-<br>enced<br>(N=762) |          | All participants<br>(N=1416)                                               |          | COVID-19-naïve<br>(N=852) |          | COVID-19-experi-<br>enced<br>(N=564) |          |
|                                                                           | Cases                       | Controls | Cases                     | Controls | Cases                               | Controls | Cases                                                                                | Controls | Cases                      | Controls | Cases                                | Controls | Cases                                                                      | Controls | Cases                     | Controls | Cases                                | Controls |
| <b>Delta waive<br/>(August to De-<br/>cember 2021)<br/>(Total number)</b> | 23                          | 193      | 7                         | 151      | 16                                  | 42       | 177                                                                                  | 2698     | 70                         | 2043     | 107                                  | 655      | 33                                                                         | 1383     | 11                        | 841      | 22                                   | 542      |
| <b>Age (years)</b>                                                        |                             |          |                           |          |                                     |          |                                                                                      |          |                            |          |                                      |          |                                                                            |          |                           |          |                                      |          |
| <50                                                                       | 22                          | 144      | 7                         | 113      | 15                                  | 31       | 149                                                                                  | 1897     | 59                         | 1381     | 90                                   | 516      | 32                                                                         | 1095     | 11                        | 655      | 21                                   | 440      |
| 50-65                                                                     | 1                           | 40       | 0                         | 31       | 1                                   | 9        | 27                                                                                   | 763      | 10                         | 630      | 17                                   | 133      | 1                                                                          | 287      | 0                         | 185      | 1                                    | 102      |
| >65                                                                       | 0                           | 9        | 0                         | 7        | 0                                   | 2        | 1                                                                                    | 38       | 1                          | 32       | 0                                    | 6        | 0                                                                          | 1        | 0                         | 1        | 0                                    | 0        |
| <b>Gender</b>                                                             |                             |          |                           |          |                                     |          |                                                                                      |          |                            |          |                                      |          |                                                                            |          |                           |          |                                      |          |
| Male                                                                      | 17                          | 127      | 3                         | 99       | 14                                  | 28       | 109                                                                                  | 1939     | 44                         | 1482     | 65                                   | 457      | 23                                                                         | 1095     | 5                         | 681      | 18                                   | 414      |
| Female                                                                    | 6                           | 66       | 4                         | 52       | 2                                   | 14       | 68                                                                                   | 759      | 26                         | 561      | 42                                   | 198      | 10                                                                         | 288      | 6                         | 160      | 4                                    | 128      |
| <b>August 2021<br/>(Total number)</b>                                     | 6                           | 210      | 0                         | 158      | 6                                   | 52       | 36                                                                                   | 2772     | 0                          | 2060     | 36                                   | 712      | 2                                                                          | 1414     | 0                         | 852      | 2                                    | 562      |
| <b>Age (years)</b>                                                        |                             |          |                           |          |                                     |          |                                                                                      |          |                            |          |                                      |          |                                                                            |          |                           |          |                                      |          |
| <50                                                                       | 6                           | 160      | 0                         | 120      | 6                                   | 40       | 30                                                                                   | 1988     | 0                          | 1421     | 30                                   | 567      | 2                                                                          | 1127     | 0                         | 666      | 2                                    | 461      |
| 50-65                                                                     | 0                           | 41       | 0                         | 31       | 0                                   | 10       | 6                                                                                    | 751      | 0                          | 611      | 6                                    | 140      | 0                                                                          | 286      | 0                         | 185      | 0                                    | 101      |
| >65                                                                       | 0                           | 9        | 0                         | 7        | 0                                   | 2        | 0                                                                                    | 33       | 0                          | 28       | 0                                    | 5        | 0                                                                          | 1        | 0                         | 1        | 0                                    | 0        |
| <b>Gender</b>                                                             |                             |          |                           |          |                                     |          |                                                                                      |          |                            |          |                                      |          |                                                                            |          |                           |          |                                      |          |
| Male                                                                      | 6                           | 138      | 0                         | 102      | 6                                   | 36       | 18                                                                                   | 1977     | 0                          | 1484     | 18                                   | 493      | 2                                                                          | 1116     | 0                         | 686      | 2                                    | 430      |
| Female                                                                    | 0                           | 72       | 0                         | 56       | 0                                   | 16       | 18                                                                                   | 795      | 0                          | 576      | 18                                   | 219      | 0                                                                          | 298      | 0                         | 166      | 0                                    | 132      |
| <b>September<br/>2021<br/>(Total number)</b>                              | 2                           | 208      | 0                         | 158      | 2                                   | 50       | 20                                                                                   | 2752     | 0                          | 2060     | 20                                   | 692      | 1                                                                          | 1413     | 0                         | 852      | 1                                    | 561      |
| <b>Age (years)</b>                                                        |                             |          |                           |          |                                     |          |                                                                                      |          |                            |          |                                      |          |                                                                            |          |                           |          |                                      |          |
| <50                                                                       | 1                           | 159      | 0                         | 120      | 1                                   | 39       | 15                                                                                   | 1973     | 0                          | 1421     | 15                                   | 552      | 1                                                                          | 1124     | 0                         | 666      | 1                                    | 458      |
| 50-65                                                                     | 1                           | 40       | 0                         | 31       | 1                                   | 9        | 5                                                                                    | 746      | 0                          | 611      | 5                                    | 135      | 0                                                                          | 286      | 0                         | 185      | 0                                    | 101      |
| >65                                                                       | 0                           | 9        | 0                         | 7        | 0                                   | 2        | 0                                                                                    | 33       | 0                          | 28       | 0                                    | 5        | 0                                                                          | 1        | 0                         | 1        | 0                                    | 0        |
| <b>Gender</b>                                                             |                             |          |                           |          |                                     |          |                                                                                      |          |                            |          |                                      |          |                                                                            |          |                           |          |                                      |          |
| Male                                                                      | 1                           | 137      | 0                         | 102      | 1                                   | 35       | 12                                                                                   | 1965     | 0                          | 1484     | 12                                   | 481      | 1                                                                          | 1115     | 0                         | 686      | 1                                    | 429      |
| Female                                                                    | 1                           | 71       | 0                         | 56       | 1                                   | 15       | 8                                                                                    | 787      | 0                          | 576      | 8                                    | 211      | 0                                                                          | 298      | 0                         | 166      | 0                                    | 132      |
| <b>October 2021<br/>(Total number)</b>                                    | 3                           | 205      | 0                         | 158      | 3                                   | 47       | 9                                                                                    | 2743     | 0                          | 2060     | 9                                    | 683      | 4                                                                          | 1409     | 0                         | 852      | 4                                    | 557      |

|                      |   |     |   |     |   |    |    |      |    |      |    |     |    |      |    |     |    |     |
|----------------------|---|-----|---|-----|---|----|----|------|----|------|----|-----|----|------|----|-----|----|-----|
| <b>Age (years)</b>   |   |     |   |     |   |    |    |      |    |      |    |     |    |      |    |     |    |     |
| <50                  | 3 | 156 | 0 | 120 | 3 | 36 | 7  | 1966 | 0  | 1421 | 7  | 545 | 4  | 1120 | 0  | 666 | 4  | 454 |
| 50-65                | 0 | 40  | 0 | 31  | 0 | 9  | 2  | 744  | 0  | 611  | 2  | 133 | 0  | 286  | 0  | 185 | 0  | 101 |
| >65                  | 0 | 9   | 0 | 7   | 0 | 2  | 0  | 33   | 0  | 28   | 0  | 5   | 0  | 1    | 0  | 1   | 0  | 0   |
| <b>Gender</b>        |   |     |   |     |   |    |    |      |    |      |    |     |    |      |    |     |    |     |
| Male                 | 2 | 135 | 0 | 102 | 2 | 33 | 6  | 1959 | 0  | 1484 | 6  | 475 | 3  | 1112 | 0  | 686 | 3  | 426 |
| Female               | 1 | 70  | 0 | 56  | 1 | 14 | 3  | 784  | 0  | 576  | 3  | 208 | 1  | 297  | 0  | 166 | 1  | 131 |
| <b>November 2021</b> |   |     |   |     |   |    |    |      |    |      |    |     |    |      |    |     |    |     |
| (Total number)       | 5 | 200 | 0 | 158 | 5 | 42 | 37 | 2706 | 0  | 2060 | 37 | 646 | 12 | 1397 | 0  | 852 | 12 | 545 |
| <b>Age (years)</b>   |   |     |   |     |   |    |    |      |    |      |    |     |    |      |    |     |    |     |
| <50                  | 5 | 151 | 0 | 120 | 5 | 31 | 34 | 1932 | 0  | 1421 | 34 | 511 | 11 | 1109 | 0  | 666 | 11 | 443 |
| 50-65                | 0 | 0   | 0 | 31  | 0 | 9  | 3  | 741  | 0  | 611  | 3  | 130 | 1  | 285  | 0  | 185 | 1  | 100 |
| >65                  | 0 | 0   | 0 | 7   | 0 | 2  | 0  | 33   | 0  | 28   | 0  | 5   | 0  | 1    | 0  | 1   | 0  | 0   |
| <b>Gender</b>        |   |     |   |     |   |    |    |      |    |      |    |     |    |      |    |     |    |     |
| Male                 | 5 | 130 | 0 | 102 | 5 | 28 | 26 | 1933 | 0  | 1484 | 26 | 449 | 11 | 1101 | 0  | 686 | 11 | 415 |
| Female               | 0 | 70  | 0 | 56  | 0 | 14 | 11 | 733  | 0  | 576  | 11 | 157 | 1  | 296  | 0  | 166 | 1  | 130 |
| <b>December 2021</b> |   |     |   |     |   |    |    |      |    |      |    |     |    |      |    |     |    |     |
| (Total number)       | 7 | 193 | 7 | 151 | 0 | 42 | 73 | 2633 | 68 | 1992 | 5  | 641 | 14 | 1383 | 11 | 841 | 3  | 542 |
| <b>Age (years)</b>   |   |     |   |     |   |    |    |      |    |      |    |     |    |      |    |     |    |     |
| <50                  | 7 | 193 | 7 | 113 | 0 | 31 | 62 | 1870 | 58 | 1363 | 4  | 507 | 14 | 1095 | 11 | 655 | 3  | 440 |
| 50-65                | 0 | 0   | 0 | 31  | 0 | 9  | 10 | 731  | 9  | 602  | 1  | 129 | 0  | 285  | 0  | 185 | 0  | 100 |
| >65                  | 0 | 0   | 0 | 7   | 0 | 2  | 1  | 32   | 1  | 27   | 0  | 5   | 0  | 1    | 0  | 1   | 0  | 0   |
| <b>Gender</b>        |   |     |   |     |   |    |    |      |    |      |    |     |    |      |    |     |    |     |
| Male                 | 3 | 127 | 3 | 99  | 0 | 28 | 45 | 1888 | 43 | 1441 | 2  | 447 | 6  | 1095 | 5  | 681 | 1  | 414 |
| Female               | 4 | 66  | 4 | 52  | 0 | 14 | 28 | 745  | 25 | 551  | 3  | 194 | 8  | 288  | 6  | 160 | 2  | 128 |

**Table S2.** Demographic characteristics of the participants used to estimate effectiveness of vaccination schemes including BNT162b2 or Gam-COVID-Vac during the Omicron wave.

| No vaccination                                                           |  |                                  |               |                               |               |                                    |               | 2 Gam-COVID-Vac doses<br>(2nd dose given > 6 months prior to<br>start of wave) |               |                                |               |                                     |               | 2 BNT162b2 doses<br>(2nd dose given 3 to < 6 months prior to<br>start of wave) |               |                               |               |                                     |               | 2xGam-COVID-Vac/1xBNT162b2 doses<br>(3rd dose given < 3 months prior to<br>start of wave) |               |                               |               |                                     |               | 2xBNT162b2/1xBNT162b2 doses<br>(3rd dose given < 3 months prior to<br>start of wave) |               |                              |               |                                    |               |
|--------------------------------------------------------------------------|--|----------------------------------|---------------|-------------------------------|---------------|------------------------------------|---------------|--------------------------------------------------------------------------------|---------------|--------------------------------|---------------|-------------------------------------|---------------|--------------------------------------------------------------------------------|---------------|-------------------------------|---------------|-------------------------------------|---------------|-------------------------------------------------------------------------------------------|---------------|-------------------------------|---------------|-------------------------------------|---------------|--------------------------------------------------------------------------------------|---------------|------------------------------|---------------|------------------------------------|---------------|
|                                                                          |  | All partici-<br>pants<br>(N=203) |               | COVID-19-<br>naïve<br>(N=146) |               | COVID-19-<br>experienced<br>(N=57) |               | All partici-<br>pants<br>(N=2070)                                              |               | COVID-19-<br>naïve<br>(N=1450) |               | COVID-19-<br>experienced<br>(N=620) |               | All partici-<br>pants<br>(N=1360)                                              |               | COVID-19-<br>naïve<br>(N=819) |               | COVID-19-<br>experienced<br>(N=541) |               | All partici-<br>pants<br>(N=765)                                                          |               | COVID-19-<br>naïve<br>(N=561) |               | COVID-19-<br>experienced<br>(N=204) |               | All partici-<br>pants<br>(N=71)                                                      |               | COVID-19-<br>naïve<br>(N=28) |               | COVID-19-<br>experienced<br>(N=43) |               |
|                                                                          |  | Case<br>s                        | Con-<br>trols | Case<br>s                     | Con-<br>trols | Case<br>s                          | Con-<br>trols | Case<br>s                                                                      | Con-<br>trols | Case<br>s                      | Con-<br>trols | Case<br>s                           | Con-<br>trols | Case<br>s                                                                      | Con-<br>trols | Case<br>s                     | Con-<br>trols | Case<br>s                           | Con-<br>trols | Case<br>s                                                                                 | Con-<br>trols | Case<br>s                     | Con-<br>trols | Case<br>s                           | Con-<br>trols | Case<br>s                                                                            | Con-<br>trols | Case<br>s                    | Con-<br>trols | Case<br>s                          | Con-<br>trols |
| Omicron<br>wave (Janu-<br>ary-Febru-<br>ary 2022)<br>(Total num-<br>ber) |  | 22                               | 181           | 19                            | 127           | 3                                  | 54            | 315                                                                            | 1755          | 245                            | 1205          | 70                                  | 550           | 109                                                                            | 1251          | 77                            | 742           | 32                                  | 509           | 34                                                                                        | 731           | 32                            | 529           | 2                                   | 202           | 3                                                                                    | 68            | 2                            | 26            | 1                                  | 42            |
| Age (years)                                                              |  |                                  |               |                               |               |                                    |               |                                                                                |               |                                |               |                                     |               |                                                                                |               |                               |               |                                     |               |                                                                                           |               |                               |               |                                     |               |                                                                                      |               |                              |               |                                    |               |
| <50                                                                      |  | 22                               | 132           | 19                            | 89            | 3                                  | 43            | 269                                                                            | 1284          | 208                            | 836           | 61                                  | 448           | 93                                                                             | 1003          | 64                            | 578           | 29                                  | 425           | 26                                                                                        | 455           | 24                            | 306           | 2                                   | 149           | 2                                                                                    | 40            | 2                            | 16            | 0                                  | 24            |
| 50-65                                                                    |  | 0                                | 40            | 0                             | 31            | 0                                  | 9             | 42                                                                             | 454           | 34                             | 354           | 8                                   | 100           | 16                                                                             | 245           | 13                            | 163           | 3                                   | 82            | 8                                                                                         | 263           | 8                             | 214           | 0                                   | 49            | 0                                                                                    | 28            | 0                            | 10            | 0                                  | 18            |
| >65                                                                      |  | 0                                | 9             | 0                             | 7             | 0                                  | 2             | 4                                                                              | 17            | 3                              | 15            | 1                                   | 2             | 0                                                                              | 3             | 0                             | 1             | 0                                   | 2             | 0                                                                                         | 13            | 0                             | 9             | 0                                   | 4             | 1                                                                                    | 0             | 0                            | 0             | 1                                  | 0             |
| Gender                                                                   |  |                                  |               |                               |               |                                    |               |                                                                                |               |                                |               |                                     |               |                                                                                |               |                               |               |                                     |               |                                                                                           |               |                               |               |                                     |               |                                                                                      |               |                              |               |                                    |               |
| Male                                                                     |  | 12                               | 121           | 10                            | 86            | 2                                  | 35            | 195                                                                            | 1287          | 152                            | 12            | 43                                  | 418           | 74                                                                             | 1007          | 52                            | 616           | 22                                  | 391           | 16                                                                                        | 516           | 15                            | 375           | 1                                   | 141           | 1                                                                                    | 50            | 0                            | 18            | 1                                  | 32            |
| Female                                                                   |  | 10                               | 60            | 9                             | 41            | 1                                  | 19            | 120                                                                            | 468           | 93                             | 1193          | 27                                  | 202           | 35                                                                             | 244           | 25                            | 126           | 10                                  | 118           | 18                                                                                        | 215           | 17                            | 154           | 1                                   | 61            | 2                                                                                    | 18            | 2                            | 8             | 0                                  | 10            |

**Table S3.** Demographic data of participants in immunogenicity subgroup analyses.

|                    | < 3 months after 2xBNT162b2<br>doses (N=87) | 3 to < 6 months after<br>2xBNT162b2 doses (N=75) | ≥ 6 months after 2xBNT162b2<br>doses (N=68) | < 3 months after<br>2xBNT162b2/1xBNT162b2<br>doses (N=60) | 3 to <6 months after 2xGam-<br>COVID-Vac (N=135) | < 3 months after 2xGam-<br>COVID-Vac/1xBNT162b2<br>doses (N=135) |
|--------------------|---------------------------------------------|--------------------------------------------------|---------------------------------------------|-----------------------------------------------------------|--------------------------------------------------|------------------------------------------------------------------|
| <b>Age (years)</b> |                                             |                                                  |                                             |                                                           |                                                  |                                                                  |
| <50                | 80 (92.0%)                                  | 64 (85.3%)                                       | 32 (47.1%)                                  | 36 (60%)                                                  | 67 (49.6%)                                       | 67 (49.6%)                                                       |
| 50-65              | 7 (8.0%)                                    | 10 (13.3%)                                       | 23 (33.8%)                                  | 17 (28.3%)                                                | 61 (45.2%)                                       | 61 (45.2%)                                                       |
| >65                | 0                                           | 1 (1.3%)                                         | 13 (19.1%)                                  | 7 (11.7%)                                                 | 7 (5.2%)                                         | 7 (5.2%)                                                         |
| <b>Gender</b>      |                                             |                                                  |                                             |                                                           |                                                  |                                                                  |
| Male               | 59 (67.8%)                                  | 43 (57.3%)                                       | 37 (54.4%)                                  | 35 (58.3%)                                                | 76 (56.3%)                                       | 76 (56.3%)                                                       |
| Female             | 28 (32.2%)                                  | 32 (42.7%)                                       | 31 (45.6%)                                  | 25 (41.7%)                                                | 59 (43.7%)                                       | 59 (43.7%)                                                       |
